# Supplementary material for: Ranking-Based Convolutional Neural Network Models for Peptide-MHC Class I Binding Prediction
Source: PubMed Central journal article supplement (PMC8165219; doi:10.3389/fmolb.2021.634836), 2021-05-17
Supplement: Presentation1.pdf [file Presentation1.pdf]

# Ranking-based Convolutional Neural Network Models for Peptide-MHC Class I Binding Prediction (Supplementary Materials)

Ziqi Chen<sup>1</sup>, Martin Renqiang Min<sup>2</sup> and Xia Ning<sup>1,3,4</sup>

<sup>1</sup>Computer Science and Engineering Department, The Ohio State University, Columbus, OH, US

<sup>2</sup>Machine Learning Department, NEC Labs America, Princeton, New Jersey, NJ, US

<sup>3</sup>Biomedical Informatics Department, The Ohio State University, Columbus, OH, US

<sup>4</sup>Translational Data Analytics Institute, The Ohio State University, Columbus, OH, US

Correspondence\*:  
Xia Ning  
ning.104@osu.edu

## APPENDIX

### A1 ADDITIONAL EXPERIMENTAL RESULTS

#### A1.1 Hyperparameter Search Space

The search space of hyperparameters includes batch size {32, 128}, number of layers {1, 2}, filter size {1, 3, 5}, number of filters {8, 16, 64} and the size of output layer {8, 16, 64}.

#### A1.2 Model Architecture Comparison

Table A1, A2, A3 and A4 present the average percentage improvement of our models over the baseline MHCflurry with MS. Models are trained with BLOSUM +Onehot +Deep and selected with respect to 4 different metrics (i.e., AR<sub>100</sub>, HR<sub>100</sub>, AUC and ROC<sub>5</sub>, respectively).

#### A1.3 Encoding Method Comparison

Table A5, A6, A7, and A8 present the average percentage improvement of the 7 encoding methods over the baseline encoding method BLOSUM. We used SpConvM with H<sub>v</sub> as the model to evaluate encoding methods and their combination. We trained the models and selected the hyper-parameters with respect to 4 different metrics (i.e., AR<sub>100</sub>, HR<sub>100</sub>, AUC and ROC<sub>5</sub>, respectively).

**Table A1.** Performance Comparison over MHCflurry with MS (AR<sub>100</sub>; BLOSUM+Onehot+Deep)

| Model     | loss           | AR <sub>100</sub> | HR <sub>100</sub> | AR <sub>500</sub> | HR <sub>500</sub> | AUC         | ROC <sub>5</sub> | ROC <sub>10</sub> |
|-----------|----------------|-------------------|-------------------|-------------------|-------------------|-------------|------------------|-------------------|
| ConvM     | H <sub>v</sub> | 8.08              | 4.79              | 3.56              | 5.93              | 6.36        | 9.92             | 10.01             |
|           | H <sub>l</sub> | 6.36              | 4.50              | 1.33              | 4.50              | 5.21        | 6.57             | 5.92              |
|           | H <sub>i</sub> | 6.58              | 3.49              | 1.36              | 3.26              | 5.63        | 7.25             | 6.05              |
|           | MS             | -5.17             | -7.93             | -6.69             | -1.93             | 1.24        | -3.51            | -3.36             |
| SpConvM   | H <sub>v</sub> | 10.75             | 7.58              | <b>8.06</b>       | <b>9.61</b>       | <b>8.68</b> | <b>18.84</b>     | <b>16.29</b>      |
|           | H <sub>l</sub> | 10.10             | 5.39              | 5.87              | 6.69              | 7.39        | 14.09            | 10.97             |
|           | H <sub>i</sub> | 10.59             | <b>8.28</b>       | 5.32              | 7.47              | 7.35        | 14.66            | 11.56             |
|           | MS             | 7.36              | 7.54              | 3.27              | 5.74              | 5.16        | 15.66            | 11.68             |
| MHCflurry | H <sub>v</sub> | <b>10.95</b>      | 6.74              | 6.62              | 7.95              | 6.45        | 15.87            | 11.45             |
|           | H <sub>l</sub> | 8.61              | 7.32              | 5.37              | 6.08              | 5.71        | 10.75            | 9.39              |
|           | H <sub>i</sub> | 8.20              | 4.19              | 4.87              | 5.87              | 4.92        | 11.79            | 7.99              |
|           | MS             | 0.00              | 0.00              | 0.00              | 0.00              | 0.00        | 0.00             | 0.00              |

The values in the table are percentage improvement compared with the baseline MHCflurry with MS. Models are trained using BLOSUM+Onehot+Deep encoding methods, and selected with respect to AR<sub>100</sub> and evaluated using the 7 evaluation metrics. The best improvement with respect to each metric is **bold**.

**Table A2.** Performance Comparison over MHCflurry with MS (HR<sub>100</sub>; BLOSUM+Onehot+Deep)

| Model     | loss           | AR <sub>100</sub> | HR <sub>100</sub> | AR <sub>500</sub> | HR <sub>500</sub> | AUC         | ROC <sub>5</sub> | ROC <sub>10</sub> |
|-----------|----------------|-------------------|-------------------|-------------------|-------------------|-------------|------------------|-------------------|
| ConvM     | H <sub>v</sub> | 5.72              | 6.89              | 3.15              | 5.66              | 7.11        | 12.78            | 10.81             |
|           | H <sub>l</sub> | 4.89              | 5.54              | 2.47              | 3.50              | 6.27        | 7.34             | 8.35              |
|           | H <sub>i</sub> | 4.75              | 5.88              | 0.93              | 3.62              | 6.24        | 7.21             | 7.29              |
|           | MS             | -8.57             | 0.21              | -8.00             | -1.23             | 1.65        | -2.45            | -2.47             |
| SpConvM   | H <sub>v</sub> | 9.86              | <b>8.85</b>       | <b>7.89</b>       | 8.59              | <b>9.12</b> | <b>19.29</b>     | <b>18.11</b>      |
|           | H <sub>l</sub> | 8.18              | 7.64              | 6.46              | 6.64              | 8.44        | 15.59            | 14.08             |
|           | H <sub>i</sub> | 7.35              | 8.5               | 5.02              | 6.41              | 7.96        | 13.21            | 14.04             |
|           | MS             | 7.10              | 8.05              | 2.49              | 4.95              | 6.30        | 15.17            | 12.5              |
| MHCflurry | H <sub>v</sub> | <b>10.11</b>      | 8.54              | 7.14              | <b>9.21</b>       | 6.09        | 16.00            | 14.65             |
|           | H <sub>l</sub> | 8.78              | 6.60              | 5.55              | 5.95              | 5.50        | 13.19            | 11.30             |
|           | H <sub>i</sub> | 6.50              | 6.20              | 5.08              | 5.47              | 4.69        | 12.19            | 8.12              |
|           | MS             | 0.00              | 0.00              | 0.00              | 0.00              | 0.00        | 0.00             | 0.00              |

The values in the table are percentage improvement compared with the baseline MHCflurry with MS. Models are trained using BLOSUM+Onehot+Deep encoding methods, and selected with respect to HR<sub>100</sub> and evaluated using the 7 evaluation metrics. The best improvement with respect to each metric is **bold**.

**Table A3.** Performance Comparison over MHCflurry with MS (AUC; BLOSUM+Onehot+Deep)

| Model     | loss           | AR <sub>100</sub> | HR <sub>100</sub> | AR <sub>500</sub> | HR <sub>500</sub> | AUC         | ROC <sub>5</sub> | ROC <sub>10</sub> |
|-----------|----------------|-------------------|-------------------|-------------------|-------------------|-------------|------------------|-------------------|
| ConvM     | H <sub>v</sub> | 6.83              | 2.28              | 5.03              | 7.34              | 3.44        | 9.69             | 8.55              |
|           | H <sub>l</sub> | 3.00              | 3.12              | 3.88              | 6.88              | 3.16        | 5.41             | 5.81              |
|           | H <sub>i</sub> | 3.66              | -0.63             | 3.01              | 5.83              | 2.81        | 4.43             | 3.58              |
|           | MS             | -9.12             | -8.45             | -5.46             | -2.31             | -0.52       | -5.62            | -5.45             |
| SpConvM   | H <sub>v</sub> | <b>10.27</b>      | <b>4.42</b>       | <b>9.24</b>       | <b>10.08</b>      | <b>5.09</b> | <b>17.20</b>     | <b>15.06</b>      |
|           | H <sub>l</sub> | 7.18              | 2.84              | 8.12              | 8.31              | 4.42        | 12.36            | 10.63             |
|           | H <sub>i</sub> | 7.54              | 2.98              | 7.69              | 7.25              | 4.44        | 11.57            | 10.04             |
|           | MS             | 4.31              | 2.49              | 5.28              | 4.78              | 2.86        | 11.68            | 9.47              |
| MHCflurry | H <sub>v</sub> | 8.08              | 1.61              | 7.45              | 8.35              | 4.30        | 11.02            | 11.05             |
|           | H <sub>l</sub> | 7.64              | 3.96              | 6.31              | 7.61              | 3.56        | 8.63             | 7.63              |
|           | H <sub>i</sub> | 7.39              | 1.64              | 5.81              | 6.74              | 3.41        | 9.32             | 7.68              |
|           | MS             | 0.00              | 0.00              | 0.00              | 0.00              | 0.00        | 0.00             | 0.00              |

The values in the table are percentage improvement compared with the baseline MHCflurry with MS. Models are trained using BLOSUM+Onehot+Deep encoding methods, and selected with respect to AUC and evaluated using the 7 evaluation metrics. The best improvement with respect to each metric is **bold**.

**Table A4.** Performance Comparison over MHCflurry with MS (ROC<sub>5</sub>; BLOSUM+Onehot+Deep)

| Model     | loss           | AR <sub>100</sub> | HR <sub>100</sub> | AR <sub>500</sub> | HR <sub>500</sub> | AUC         | ROC <sub>5</sub> | ROC <sub>10</sub> |
|-----------|----------------|-------------------|-------------------|-------------------|-------------------|-------------|------------------|-------------------|
| ConvM     | H <sub>v</sub> | 8.38              | 6.71              | 3.23              | 6.86              | 5.14        | 5.91             | 4.63              |
|           | H <sub>l</sub> | 3.33              | 5.16              | 0.96              | 5.52              | 4.22        | 5.22             | 2.56              |
|           | H <sub>i</sub> | 8.36              | 7.95              | 3.35              | 5.83              | 5.01        | 5.40             | 3.70              |
|           | MS             | -11.59            | -5.75             | -8.19             | -2.14             | 0.23        | -7.20            | -8.84             |
| SpConvM   | H <sub>v</sub> | <b>12.78</b>      | <b>15.81</b>      | <b>8.31</b>       | <b>11.11</b>      | <b>7.29</b> | <b>15.03</b>     | <b>10.52</b>      |
|           | H <sub>l</sub> | 11.71             | 9.88              | 5.45              | 8.12              | 6.20        | 12.09            | 7.72              |
|           | H <sub>i</sub> | 10.18             | 8.09              | 7.40              | 9.58              | 6.65        | 10.38            | 8.09              |
|           | MS             | 5.25              | 3.68              | 2.96              | 4.81              | 4.49        | 13.54            | 6.87              |
| MHCflurry | H <sub>v</sub> | 11.20             | 11.53             | 7.09              | 7.44              | 6.32        | 10.38            | 8.31              |
|           | H <sub>l</sub> | 1.87              | 0.36              | 0.09              | 1.16              | 3.22        | 13.76            | 9.80              |
|           | H <sub>i</sub> | 7.64              | 8.25              | 5.83              | 6.28              | 5.36        | 8.66             | 7.74              |
|           | MS             | 0.00              | 0.00              | 0.00              | 0.00              | 0.00        | 0.00             | 0.00              |

The values in the table are percentage improvement compared with the baseline MHCflurry with MS. Models are trained using BLOSUM+Onehot+Deep encoding methods, and selected with respect to ROC<sub>5</sub> and evaluated using the 7 evaluation metrics. The best improvement with respect to each metric is **bold**.

**Table A5.** Encoding Performance Comparison on SpConvM with H<sub>v</sub> (AR<sub>100</sub>)

| encoding             | AR <sub>100</sub> | HR <sub>100</sub> | AR <sub>500</sub> | HR <sub>500</sub> | AUC         | ROC <sub>5</sub> | ROC <sub>10</sub> |
|----------------------|-------------------|-------------------|-------------------|-------------------|-------------|------------------|-------------------|
| BLOSUM               | 0.00              | 0.00              | 0.00              | 0.00              | 0.00        | 0.00             | 0.00              |
| Onehot               | -6.04             | -4.09             | -6.00             | -1.75             | -1.13       | -5.38            | -5.34             |
| Deep                 | -4.74             | -0.98             | -2.55             | -0.09             | -0.13       | 0.26             | -1.17             |
| BLOSUM +Onehot       | -0.62             | -0.06             | -0.62             | 1.68              | 0.27        | 3.17             | 1.22              |
| BLOSUM +Deep         | <b>1.43</b>       | <b>3.33</b>       | <b>0.66</b>       | 2.62              | <b>0.57</b> | 4.88             | 2.73              |
| Onehot +Deep         | -4.10             | -3.16             | -2.64             | -0.37             | 0.01        | -1.83            | -2.29             |
| BLOSUM +Onehot +Deep | 0.15              | -0.15             | -0.47             | <b>3.53</b>       | 0.53        | <b>6.29</b>      | <b>3.53</b>       |

The values in the table are percentage improvement compared with the BLOSUM encoding method. Models are selected with respect to AR<sub>100</sub> and evaluated using the 7 evaluation metrics. The best improvement with respect to each metric is **bold**.

**Table A6.** Encoding Performance Comparison on SpConvM with  $H_v$  (HR<sub>100</sub>)

| encoding             | AR <sub>100</sub> | HR <sub>100</sub> | AR <sub>500</sub> | HR <sub>500</sub> | AUC         | ROC <sub>5</sub> | ROC <sub>10</sub> |
|----------------------|-------------------|-------------------|-------------------|-------------------|-------------|------------------|-------------------|
| BLOSUM               | 0.00              | 0.00              | 0.00              | 0.00              | 0.00        | 0.00             | 0.00              |
| Onehot               | -6.20             | -3.31             | -5.71             | -3.85             | -0.69       | -7.10            | -5.47             |
| Deep                 | -3.81             | -0.44             | -2.64             | -0.21             | 0.26        | -0.36            | 0.09              |
| BLOSUM +Onehot       | -1.47             | 0.98              | -0.70             | -0.04             | 0.11        | 1.61             | 0.85              |
| BLOSUM +Deep         | -0.40             | <b>2.45</b>       | -0.30             | 0.57              | 0.28        | 3.39             | 1.97              |
| Onehot +Deep         | -6.45             | -2.48             | -4.34             | -1.71             | -0.55       | -3.08            | -3.13             |
| BLOSUM +Onehot +Deep | <b>0.58</b>       | 0.07              | <b>0.98</b>       | <b>2.16</b>       | <b>0.75</b> | <b>4.56</b>      | <b>3.50</b>       |

The values in the table are percentage improvement compared with the BLOSUM encoding method. Models are selected with respect to HR<sub>100</sub> and evaluated using the 7 evaluation metrics. The best improvement with respect to each metric is **bold**.

**Table A7.** Encoding Performance Comparison on SpConvM with  $H_v$  (AUC)

| encoding             | AR <sub>100</sub> | HR <sub>100</sub> | AR <sub>500</sub> | HR <sub>500</sub> | AUC         | ROC <sub>5</sub> | ROC <sub>10</sub> |
|----------------------|-------------------|-------------------|-------------------|-------------------|-------------|------------------|-------------------|
| BLOSUM               | 0.00              | 0.00              | 0.00              | 0.00              | 0.00        | 0.00             | 0.00              |
| Onehot               | -6.75             | -4.84             | -4.37             | -2.55             | -0.91       | -6.85            | -5.34             |
| Deep                 | -3.31             | -0.59             | -2.09             | -0.71             | -0.19       | -1.06            | -1.49             |
| BLOSUM +Onehot       | -0.45             | <b>0.97</b>       | 0.22              | 0.52              | 0.09        | 1.41             | 1.02              |
| BLOSUM +Deep         | <b>0.95</b>       | -0.84             | 1.09              | <b>1.58</b>       | 0.55        | 3.25             | 2.00              |
| Onehot +Deep         | -2.90             | -3.40             | -2.68             | -1.56             | -0.39       | -4.13            | -3.26             |
| BLOSUM +Onehot +Deep | 0.77              | -0.67             | <b>1.43</b>       | 1.05              | <b>0.62</b> | <b>5.90</b>      | <b>3.95</b>       |

The values in the table are percentage improvement compared with the BLOSUM encoding method. Models are selected with respect to AUC and evaluated using the 7 evaluation metrics. The best improvement with respect to each metric is **bold**.

**Table A8.** Encoding Performance Comparison on SpConvM with  $H_v$  (ROC<sub>5</sub>)

| encoding             | AR <sub>100</sub> | HR <sub>100</sub> | AR <sub>500</sub> | HR <sub>500</sub> | AUC         | ROC <sub>5</sub> | ROC <sub>10</sub> |
|----------------------|-------------------|-------------------|-------------------|-------------------|-------------|------------------|-------------------|
| BLOSUM               | 0.00              | 0.00              | 0.00              | 0.00              | 0.00        | 0.00             | 0.00              |
| Onehot               | -7.96             | -7.56             | -5.22             | -2.32             | -1.05       | -5.61            | -4.81             |
| Deep                 | -2.29             | -0.84             | -2.76             | -0.78             | -0.54       | -0.69            | -1.28             |
| BLOSUM +Onehot       | 1.24              | -0.16             | 0.18              | 0.40              | 0.00        | 1.38             | 1.12              |
| BLOSUM +Deep         | <b>2.84</b>       | 0.15              | 1.41              | <b>1.90</b>       | 0.60        | 3.20             | 3.14              |
| Onehot +Deep         | -4.76             | -2.90             | -3.31             | -1.28             | -0.61       | -2.58            | -2.30             |
| BLOSUM +Onehot +Deep | 2.57              | <b>0.20</b>       | <b>2.08</b>       | 1.46              | <b>0.82</b> | <b>3.83</b>      | <b>3.47</b>       |

The values in the table are percentage improvement compared with the BLOSUM encoding method. Models are selected with respect to ROC<sub>5</sub> and evaluated using the 7 evaluation metrics. The best improvement with respect to each metric is **bold**.
